# Supplementary material
Source: HighWire-hosted journal article supplement (https://erj.ersjournals.com/content/56/2/2000418)
Supplement: inline-supplementary-material-2 [file inline-supplementary-material-2.pdf]

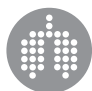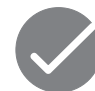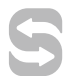

SHAREABLE PDF

# Environmental fungal sensitisation associates with poorer clinical outcomes in COPD

Pei Yee Tiew<sup>1,2</sup>, Fanny Wai San Ko <sup>3</sup>, Sze Lei Pang <sup>4</sup>, Sri Anusha Matta<sup>4</sup>, Yang Yie Sio<sup>4</sup>, Mau Ern Poh<sup>5</sup>, Kenny J.X. Lau<sup>6</sup>, Micheál Mac Aogáin<sup>1</sup>, Tavleen Kaur Jaggi<sup>1</sup>, Fransiskus Xaverius Ivan<sup>1</sup>, Nicolas E. Gaultier <sup>6</sup>, Akira Uchida<sup>6</sup>, Daniela I. Drautz-Moses<sup>6</sup>, Huiying Xu<sup>7</sup>, Mariko Siyue Koh <sup>2</sup>, David Shu Cheong Hui<sup>3</sup>, Augustine Tee<sup>8</sup>, John Arputhan Abisheganaden<sup>7</sup>, Stephan C. Schuster<sup>6</sup>, Fook Tim Chew <sup>4</sup> and Sanjay H. Chotirmall <sup>1</sup>

**Affiliations:** <sup>1</sup>Lee Kong Chian School of Medicine, Nanyang Technological University, Singapore. <sup>2</sup>Dept of Respiratory and Critical Care Medicine, Singapore General Hospital, Singapore. <sup>3</sup>Dept of Medicine and Therapeutics, The Chinese University of Hong Kong, Hong Kong. <sup>4</sup>Dept of Biological Sciences, National University of Singapore, Singapore. <sup>5</sup>Dept of Medicine, Faculty of Medicine, University of Malaya, Kuala Lumpur, Malaysia. <sup>6</sup>Singapore Centre for Environmental Life Sciences Engineering (SCELSSE), Nanyang Technological University, Singapore. <sup>7</sup>Dept of Respiratory and Critical Care Medicine, Tan Tock Seng Hospital, Singapore. <sup>8</sup>Dept of Respiratory and Critical Care Medicine, Changi General Hospital, Singapore.

**Correspondence:** Sanjay H. Chotirmall, Lee Kong Chian School of Medicine, Nanyang Technological University, 11 Mandalay Road, Singapore 308232. E-mail: schotirmall@ntu.edu.sg

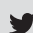

@ERSpublications

**Fungal sensitisation associates with frequent exacerbations in COPD, and represents a treatable trait. Outdoor and indoor environments represent a key source of fungal allergen exposure, amenable to intervention, in “sensitised” COPD patients.** <https://bit.ly/2Vw3kHi>

**Cite this article as:** Tiew PY, Ko FWS, Pang SL, *et al.* Environmental fungal sensitisation associates with poorer clinical outcomes in COPD. *Eur Respir J* 2020; 56: 2000418 [<https://doi.org/10.1183/13993003.00418-2020>].

This single-page version can be shared freely online.

## ABSTRACT

**Introduction:** Allergic sensitisation to fungi such as *Aspergillus* are associated to poor clinical outcomes in asthma, bronchiectasis and cystic fibrosis; however, clinical relevance in COPD remains unclear.

**Methods:** Patients with stable COPD (n=446) and nondiseased controls (n=51) were prospectively recruited across three countries (Singapore, Malaysia and Hong Kong) and screened against a comprehensive allergen panel including house dust mites, pollens, cockroach and fungi. For the first time, using a metagenomics approach, we assessed outdoor and indoor environmental allergen exposure in COPD. We identified key fungi in outdoor air and developed specific-IgE assays against the top culturable fungi, linking sensitisation responses to COPD outcomes. Indoor air and surface allergens were prospectively evaluated by metagenomics in the homes of 11 COPD patients and linked to clinical outcome.

**Results:** High frequencies of sensitisation to a broad range of allergens occur in COPD. Fungal sensitisation associates with frequent exacerbations, and unsupervised clustering reveals a “highly sensitised fungal predominant” subgroup demonstrating significant symptomatology, frequent exacerbations and poor lung function. Outdoor and indoor environments serve as important reservoirs of fungal allergen exposure in COPD and promote a sensitisation response to outdoor air fungi. Indoor (home) environments with high fungal allergens associate with greater COPD symptoms and poorer lung function, illustrating the importance of environmental exposures on clinical outcomes in COPD.

**Conclusion:** Fungal sensitisation is prevalent in COPD and associates with frequent exacerbations representing a potential treatable trait. Outdoor and indoor (home) environments represent a key source of fungal allergen exposure, amenable to intervention, in “sensitised” COPD.
